# 1 Increased risk of asthma in female night shift workers

2 Robert J. Maidstone<sup>1</sup>, David W. Ray<sup>2,3,4,5</sup>, Junxi Liu<sup>6</sup>, Jack Bowden<sup>7</sup>, Martin K. Rutter<sup>8,9\*</sup> and Hannah J.  
3 Durrington<sup>1,10\*</sup>

4 \* MKR and HJD contributed equally

5 1 Division of Immunology, Immunity to Infection and Respiratory Medicine, School of Biological Sciences,  
6 Faculty of Biology, Medicine and Health, University of Manchester, UK.

7 2 NIHR Oxford Health Biomedical Research Centre, John Radcliffe Hospital, Oxford, UK

8 3 NIHR Oxford Biomedical Research Centre, John Radcliffe Hospital, Oxford, UK

9 4 Oxford Centre for Diabetes, Endocrinology and Metabolism, University of Oxford, Oxford, UK.

10 5 Oxford Kavli Centre for Nanoscience Discovery, University of Oxford, Oxford, UK.

11 6 Nuffield Department of Population Health, Oxford Population Health, University of Oxford, Oxford, UK

12 7 Department of Clinical and Biomedical Sciences, Faculty of Health and Life Sciences, University of Exeter,  
13 Exeter, UK

14 8 Division of Diabetes, Endocrinology & Gastroenterology, School of Medical Sciences, Faculty of Biology,  
15 Medicine and Health, University of Manchester, UK.

16 9 Manchester Diabetes Centre, Central Manchester University Hospitals NHS Foundation Trust,  
17 Manchester Academic Health Science Centre, Manchester, UK.

18 10 Wythenshawe Hospital, University Hospital of South Manchester, Manchester University NHS  
19 Foundation Trust (MFT), Southmoor Road, Wythenshawe, Manchester, M239LT, UK.

## 20 **Conflicts of Interest**

21 RJM, DWR, JL and HJD report no conflicts of interest. JB is a part time employee of Novo Nordisk Research Centre  
22 Oxford, limited. MKR reports receiving consultancy fees from Eli Lilly and has modest stock holding in GSK unrelated  
23 to the submitted work.

24

25 **Funding**

26 This work was funded by Asthma and Lung UK WAPG22/100005.

27 RJM is supported by the Asthma and Lung UK grant above.

28 DWR is supported by MRC grants MR/W019000/1, MR/V034049/1 and the NIHR Oxford Health Biomedical Research  
29 Centre grant NIHR203316. The views expressed in the manuscript are those of the authors and not necessarily those  
30 of the NIHR or the Department of Health and Social Care.

31 JL is working as an Oxford - Novo Nordisk fellow funded by Novo Nordisk.

32 JB is supported by research grant MR/X011372/1. He is also a part time employee of Novo Nordisk Research Centre,  
33 Oxford.

34 HJD holds a MRC Clinician Scientist Fellowship MRC-CSF-MR/V029460/1 and is supported by the NIHR Manchester  
35 Biomedical Research Centre (NIHR203308).

36

37

38

39

40

41

42

43

44

15 **Abstract**

16 **Background** Asthma is more common in females and more common in night shift workers. Since increasing numbers  
17 of females are becoming shift workers it is important to determine if shift work-associated asthma risk is higher in  
18 females.

19 **Research Question** Is increasing frequency of night shift work more strongly related to prevalent asthma in females  
20 than in males?

21 **Study Design and Methods** We used cross-sectional data from >280,000 UK Biobank participants and logistic  
22 regression models adjusted for demographic and lifestyle factors to describe sex differences in prevalent asthma  
23 related to shift work frequency. To obtain mechanistic insights, we explored associations with chronotype, sex  
24 hormones and menopause.

25 **Results** Compared to female day workers, female permanent night shift workers had higher covariate-adjusted odds  
26 of moderate-severe asthma (OR: 1.50 (95% CI 1.18 – 1.91)) but there was no corresponding relationship in males (OR  
27 0.95 (95% CI 0.72 – 1.26); sex interaction p-value = 0.01). Similar relationships were observed for ‘all asthma’ and for  
28 ‘wheeze or whistling in the chest’ outcomes. Female shift work-related asthma was driven by relationships in  
29 postmenopausal women not using HRT (e.g., adjusted OR: 1.89 (1.24-2.87) for moderate-severe asthma; sex  
30 interaction p-value = 0.02 in permanent nightshift workers compared to dayworkers) but these relationships  
31 attenuated to the null in postmenopausal women using HRT.

32 **Interpretation** Our finding that increasing shift work frequency is more strongly related to asthma in females than in  
33 males could have Public Health implications. Intervention studies should determine if modifying shift work schedules  
34 or HRT can reduce asthma risk in females.

35 **Key Words**

36 *Shift work, female, asthma, chronotype, sex hormones, menopause*

37 **Abbreviations**

- 58 BMI = Body Mass Index, CI = Confidence Interval, FEV1 = Forced Expiratory Volume in 1 second, HRT = Hormone  
59 Replacement Therapy, OCP = Oral Contraceptive Pill, OR = Odds Ratio, RCT = Randomized Controlled Trial, SHBG =  
70 Sex Hormone Binding Globulin, TDI = Townsend Deprivation Index.

71 Asthma is a highly rhythmic inflammatory disease with symptoms worsening overnight (1), coinciding with  
72 exaggerated airway narrowing and increased airway inflammation (2).  
73 Using data from more than 280,000 UK Biobank participants (3) we previously showed that, compared to day  
74 workers, ‘permanent’ night shift workers had higher likelihood of moderate-severe asthma, possibly due to  
75 disrupted circadian rhythms.  
76 Asthma predominantly affects females, who have more severe disease, higher hospitalisation and death rates  
77 compared to males (4). The higher asthma prevalence in females starts at puberty and is associated with fluctuations  
78 in hormones during menstruation, pregnancy, and menopause suggesting a possible causal role for female sex  
79 hormones in asthma pathogenesis (5).  
80 Oestrogens regulate the circadian molecular clock (6), and oestrogen receptor  $\beta$  is expressed in a circadian manner,  
81 particularly in lung epithelial cells, so coupling circadian phase to oestrogen action in the lung (7). Compared to  
82 males, females tend to have an earlier chronotype, likely related to a shorter intrinsic circadian period (8, 9, 10).  
83 Since night shift work is currently undertaken by ~20% of workers (11) and 2/3 of the recent increase in shift worker  
84 numbers is in females (12), it is important to understand if shift work is linked to a higher risk for asthma in females  
85 than in males.  
86 Using data on UK Biobank participants, our main aim was to investigate sex differences in the association between  
87 shift work and asthma. To obtain mechanistic insights, we explored relationships of chronotype and sex hormones  
88 with asthma, and how asthma risk in female shift workers is related to menopausal status.

## 39 **Study Design and Methods**

30 UK Biobank recruited 502,540 participants (5% of those invited) aged 40 to 69 years (13). Our analysis was restricted  
31 to participants in paid employment or who were self-employed at baseline (N=274,541) (14).

### 32 **Cases of asthma**

33 Cases of asthma and moderate-severe asthma were defined as previously (15). Briefly, we identified 13,589 (5.3% of  
34 our study cohort) asthma cases, of which 4,549 (1.9%) had moderate-severe asthma. We excluded participants with  
35 doctor-diagnosed asthma who did not report taking asthma medication and participants reporting taking asthma

36 medication who did not report having doctor-diagnosed asthma (N=19,287). For analysis of moderate-severe asthma  
37 we further excluded those not receiving medication for moderate-severe asthma ((15); N = 9,040).

38 We also analysed data from participants who had ‘experienced wheeze or whistling in the chest within the last year’  
39 and participants with obstructive pulmonary function tests (<80% of the predicted percentage FEV1 (forced  
40 expiratory volume in 1 second)).

### 41 **Shift work and chronotype**

42 We categorized current shift work status as either: a) ‘day worker’, b) ‘shift worker, but only rarely if ever nights’, c)  
43 ‘irregular shift work including nights’, and d) ‘permanent night shifts’ from responses to the UK Biobank baseline  
44 questionnaire (15). Similarly, self-reported chronotype was categorized as either: a) “definitely a ‘morning’ person”,  
45 b) “intermediate chronotype” or c) “definitely an ‘evening’ person” (15).

### 46 **Sex hormones**

47 Testosterone, sex hormone binding globulin (SHBG) and oestradiol were measured using RIQAS Chemiluminescent  
48 Immunoassay on Beckman Coulter Unicel Dxl 800 (16). Oestradiol measurements below the reportable range  
49 (175pmol/L) were considered the referent group. In the continuous analysis measurements below the reportable  
50 range were set to the cut-off value.

### 51 **Statistical analysis**

52 Multivariable-adjusted logistic regression models estimated odds ratios for the presence of asthma associated with  
53 increasingly frequent shift work categories using day workers as the referent group.

54 We used three models, as in our prior study (15), including the following covariates: **Model 1** adjusted for age only;  
55 **Model 2** adjusted for age, ethnicity, chronotype, Townsend Deprivation Index (TDI), days exercised, alcohol status  
56 (current, previous or never), alcohol weekly intake, length of working week and whether the current job is  
57 considered to have an occupational asthma risk or requires a medical examination; **Model 3** adjusted for model 2  
58 covariates plus potential mediators of the shift work-asthma relationship: BMI, smoking history, pack years smoked  
59 and sleep duration (17-22). Participants with missing covariate data were excluded from analyses.

20 Interaction analyses were performed by a likelihood-ratio test between models with/without interaction terms.

21 In all statistical tests  $p < 0.05$  was considered statistically significant. All analyses were performed in RStudio

22 (v2023.12.1+402).

## 23 **Results**

### 24 **Population characteristics**

25 Demographic details by sex and shift work status are shown in **Table 1**. Male and female workers were similarly  
26 aged; females tended to smoke less than males. Female workers tended to drink less alcohol than males; both sexes  
27 showed similar trends across the work schedule groups. The ethnicity of participants was similar between the sexes.  
28 Female workers, especially those working nights, tended to work fewer weekly hours than males and come from  
29 more deprived areas.

30 Health characteristics are presented in **Table 2**. Female and male workers showed similar trends in BMI with  
31 increasing BMI associated with greater frequency of shift work, especially in females.

### 32 **Female shift workers have higher odds of moderate-severe asthma**

33 We first investigated sex differences in the association between increasing frequency of shift work and prevalent  
34 asthma. After adjusting for age (model 1), female shift workers had higher odds of moderate-severe asthma than  
35 female day workers (**Supplementary table 1**: shift work, but never or rarely night shifts, OR 1.16 (95% CI 1.02 –  
36 1.32); irregular shift work including nights, OR 1.18 (95% CI 0.99 – 1.40); permanent night shift work, OR 1.54 (95% CI  
37 1.22 – 1.95)). In contrast, male shift workers did not have a higher likelihood of moderate-severe asthma when  
38 compared to male day workers (shift work, but never or rarely night shifts, OR 1.05 (95% CI 0.89 – 1.23); irregular  
39 shift work including nights, OR 0.94 (95% CI 0.79 – 1.13); permanent night shift work, OR 0.91 (95% CI 0.69 – 1.20)).

40 Some of these relationships were maintained, but were attenuated after covariate adjustment (**Figure 1A (left)**,

41 **Supplementary table 1**; model 2, e.g. female permanent night shift workers, OR 1.50 95% CI (1.18-1.91)) and after

42 further adjustment for potential mediators (sleep duration, smoking and BMI; **Figure 1A (right)**; model 3, e.g. female

43 permanent night shift workers, OR 1.31 95% CI (1.03-1.67)). An interaction between sex and the frequency of shift

14 work was found across all models, indicating that increasing frequency of shift work was more strongly related to a  
15 higher likelihood of prevalent moderate-severe asthma in females than in males ( $p = 0.01$ ).

16 Female shift workers also had higher odds of any asthma than female day workers (after adjusting for model 2  
17 covariates: shift work, but never or rarely night shifts, OR 1.11 (95% CI 1.02 – 1.20); irregular shift work including  
18 nights, OR 1.10 (95% CI 0.99 – 1.22); permanent night shift work, OR 1.17 (95% CI 0.99 – 1.37)) whereas male shift  
19 workers showed no such corresponding relationships (shift work, but never or rarely night shifts, OR 1.05 (95% CI  
20 0.95 – 1.15); irregular shift work including nights, OR 0.94 (95% CI 0.85 – 1.04); permanent night shift work, OR 1.00  
21 (95% CI 0.86 – 1.17); **Supplementary table 2**). We found evidence of an interaction between sex and shift work  
22 status indicating that increasing frequency of shift work was more strongly related to the presence of ‘any asthma’ in  
23 females than in males ( $p = 0.01$ , **Figure 1B (left)**). The significant sex shift work interaction persisted in models  
24 adjusted for age (model 1; **Supplementary table 2**) and after adjusting for potential mediators (model 3; **Figure 1B**  
25 **(right)**)

26 Both female shift workers and male shift workers had a higher risks of experiencing wheeze or whistling in the chest  
27 (within the last year) than day workers; **Figure 2A (left)** (e.g. after adjusting for model 2 covariates; permanent  
28 female night shift workers OR 1.49 (95% CI 1.36 – 1.64) and male permanent night shift workers OR 1.31 (95% CI  
29 1.22 – 1.41)). We found evidence of a sex-shift work interaction ( $p=0.01$ ; model 2). The increased odds in male and  
30 female shift workers over day workers persisted in models 1 and 3, however a significant sex shift work interaction  
31 was only found in models 1 and 2 not in model 3 after controlling for potential mediators (**Figure 2A (right)**).

32 Further, female shift workers also had a higher risk of having obstructed lung function when compared to female day  
33 workers as did male shift workers when compared to male day workers; **Figure 2B (left)** (e.g. after adjusting for  
34 model 2 covariates permanent female night shift workers OR 1.50 (95% CI 1.25 – 1.80) and male permanent night  
35 shift workers OR 1.31 (95% CI 1.14 – 1.52)). The higher odds in male and female shift workers over day workers  
36 persisted in models 1, however was lost in all shift work schedules, except for “shift work, but never or rarely nights”  
37 where it was attenuated, after the addition of potential mediators in model 3 (**Figure 2B (right)**). No sex-shift work  
38 interaction was found in any of the models (**Supplementary table 4**).

39 **Role of chronotype and sex hormones in the sex-specific relationships linking shift work with prevalent asthma**



70 We previously showed that moderate-severe asthma was linked to extreme chronotype (15). These associations  
71 remained in sex-stratified analyses (**Figure 3A**) with no evidence of an interaction between sex and chronotype  
72 (**Supplementary table 5**). Inclusion of chronotype in sex-stratified models of shift work-asthma relationships had  
73 negligible effects compared to base models, including no change in the interaction between sex and shift work.  
74 (**Figure 3B, Supplementary table 6**).

75 Higher testosterone and SHBG were associated with lower prevalences of moderate-severe asthma in both females  
76 and males (**Supplementary figures 1A and 1B; Supplementary tables 7-8**). Corresponding relationships with  
77 oestradiol were null (**Supplementary figure 1C, Supplementary table 9**). Adding testosterone, SHBG or oestradiol  
78 into sex-stratified models of shift work-asthma relationships had negligible effects when compared to base models  
79 (**Supplementary figure 3, Supplementary tables 10-12**).

30 These data suggest that chronotype, testosterone, SHBG and oestradiol do not have major roles in  
31 moderating/mediating sex differences observed in relationships between shift work and prevalent asthma.

## 32 **Menopause and asthma**

33 When compared to premenopausal females, postmenopausal females had a similar likelihood of having moderate-  
34 severe asthma (**Figure 4A, Supplementary table 13**). However, females who were unsure of their menopausal status  
35 and reported having had a hysterectomy, with/without an oophorectomy, had 1.4-1.5 fold higher adjusted odds of  
36 moderate-severe asthma when compared to premenopausal females (**Supplementary table 13**). These results  
37 attenuated to the null after excluding females using exogenous sex hormones, such as oral contraceptive pill (OCP)  
38 or hormone replacement therapy (HRT) (**Figure 4B, Supplementary table 14**).

39 As a sensitivity analysis we reran the shift work moderate-severe asthma analysis in females who had not had a  
40 hysterectomy (**Supplementary table 15**); obtaining similar results to those observed in females previously (**Figure**  
41 **1A**).

## 32 **Role of menopause in the relationship between shift work and prevalent asthma**

33 When compared to premenopausal day workers, premenopausal permanent night shift-workers and premenopausal  
34 females who worked “shift work, but never or rarely nights” had higher likelihoods of moderate-severe asthma

35 (Figure 5A), but these relationships attenuated to the null after adjusting for potential mediators (Supplementary  
36 table 16). No relationships were found in postmenopausal/hysterectomy groups. We found no statistically significant  
37 interactions between menopause/hysterectomy status and the shift work-asthma relationship in any models  
38 (Supplementary table 16).

39 After excluding participants receiving HRT/OCP, premenopausal shift workers who never or rarely worked nights had  
40 a higher likelihood of moderate-severe asthma, but these relationships attenuated to the null after adjusting for  
41 potential mediators (Figure 5B, Supplementary table 17). After excluding participants receiving HRT/OCP,  
42 postmenopausal permanent night shift-workers had 1.9-fold higher odds of moderate-severe asthma than day  
43 workers this was robust to covariate adjustment. However, we found no evidence of an interaction between  
44 menopause/hysterectomy status overall in the shift work-asthma relationships, however numbers were small in  
45 these subgroups (Supplementary table 17).

46 To determine whether the sex effect on the shift work-related asthma relationship (Figure 1) was driven by  
47 menopausal status we tested for a sex-shift work interaction. An interaction between sex and shift work frequency  
48 was found between males and premenopausal females but not postmenopausal females (Supplementary tables 18).  
49 However, after excluding females receiving HRT/OCP, an interaction between sex and shift work frequency was  
50 found in both premenopausal and postmenopausal females, this relationship remained significant after covariate  
51 adjustment in postmenopausal females (Supplementary table 19).

## 12 Discussion

13 Our study has several novel findings. First, we found a significant sex interaction in the relationship between shift  
14 work frequency and prevalent moderate-severe asthma. Second, we showed that females, and not males, were at  
15 higher risk of moderate-severe asthma if they were night shift workers when compared to day workers. Third, we  
16 identified a significant sex interaction in relationships between shift work frequency and “any asthma” and  
17 “experiencing wheeze or whistling in the chest in the last year”. Fourth, we showed data suggesting that HRT may  
18 offer some protection from moderate-severe asthma in post-menopausal female permanent night shift-workers. Our  
19 findings have important implications for female shift workers and should be considered in asthma clinics and in  
20 Public Health Guidance.

21 To date there have been no previous studies investigating sex differences in the relationship between shift work and  
22 asthma.

23 An important potential mechanism that could explain the sex shift work interaction is differences in sex hormone  
24 levels. We demonstrated that higher levels of testosterone and SHBG are protective against asthma in both males  
25 and females, as shown previously (23). We showed no relationship between oestradiol and prevalent moderate-  
26 severe asthma. Adding sex hormones as covariates in our models had no impact on the sex-shift work interaction for  
27 the relationship with asthma suggesting a limited role of sex hormones in explaining observed sex differences.

28 However, there are some important caveats to consider in relation to our findings: a) there was no time-of-sampling  
29 data; or b) time of menstrual cycle data; and c) 80% of oestradiol levels were below the detectible level, possibly due  
30 to the age range of females studied. Such missing data reduced our statistical power.

31 We found that female participants who had had a hysterectomy  $\pm$  oophorectomy had a higher likelihood of  
32 moderate-severe asthma when compared to premenopausal females. This has been reported previously (24), and it  
33 may be that these procedures are acting as a marker for shorter lifetime exposure to oestrogen (24).

34 We showed that postmenopausal and premenopausal permanent night shift-workers had higher odds of moderate-  
35 severe asthma when compared to corresponding day workers, but only premenopausal females had a significant  
36 interaction between sex and shift work frequency. However, when postmenopausal females taking HRT or OCP were  
37 excluded, female postmenopausal permanent night shift workers had 1.9-fold higher odds of moderate-severe  
38 asthma when compared to female day workers; and a significant sex interaction was observed across all models.

39 Together this suggests that HRT or OCP use in post-menopausal females could be protective for moderate-severe  
40 asthma in the context of shift work.

41 Previous studies investigating the effect of menopause on asthma have come to different conclusions; some  
42 suggesting that the menopause is protective for asthma (25, 26) and others showing the opposite (27). The role of  
43 HRT in asthma is also currently unclear; several observational studies have suggested that HRT might have adverse  
44 effects on asthma risk (24-26, 28). However, the largest prospective study performed to date showed that  
45 previous/current HRT use was associated with 17-21% lower risks of developing asthma (29). Other recent data

16 suggests that the type of HRT might be important in determining whether HRT is a risk for, or protective against  
17 asthma (30).

18 Our results would suggest that, in postmenopausal shift workers, HRT might be protective for nightshift work-related  
19 asthma, however further research is needed to test this hypothesis in prospective studies and randomised controlled  
20 trials (RCT). These studies could test whether HRT protects against the development of asthma or reduces the  
21 severity of asthma in both dayworkers and in shift workers. It is currently unclear if shift work-related asthma risk  
22 would respond differently to HRT than asthma risk in day workers.

23 Previous studies have shown that the highest risk of HRT is in people using conjugated oestrogens (25, 31), who have  
24 a low BMI (28, 32) and are non-smokers (33). Our results also suggest that BMI and smoking moderate the  
25 relationship between sex and asthma.

26 We have shown previously that having an extreme chronotype (i.e. a definite preference for mornings or evenings) is  
27 associated with prevalent asthma (15). We know that males and females have differing distributions of chronotype  
28 with women tending to have earlier chronotypes, providing a potential mechanism for the sex differences observed.  
29 However, we found higher likelihood of moderate-severe asthma in extreme chronotypes in both male and females,  
30 and no evidence of a sex-chronotype interaction. Including chronotype in models linking shift work to moderate-  
31 severe asthma made no difference to results in either males or females. We conclude that chronotype does not  
32 explain the sex differences observed in the shift work asthma relationships.

33 Attenuation in our models suggests some effect of potential mediator variables on the sex differences observed.  
34 These variables, smoking, sleep duration and BMI, differed between the sexes with females having a higher increases  
35 of BMI and proportion of current smokers in shift work groups as compared to day workers. However, these  
36 mediators did not account for all of the effect observed as sex-shift work interactions stayed significant in Model 3.

37 Our study has several strengths. First, this is the first study to evaluate sex differences in the relationship between  
38 shift work frequency and asthma; an important topic from a public health perspective. Second, we do this in a large  
39 cohort (n=502,540) of individuals with linked health and socio-economic variables. Third, we employed a robust  
40 definition of moderate-severe asthma (15), likely capturing those with active disease. Fourth, we employed a staged  
41 modelling strategy accounting for important confounders and included potential mediators. These models

72 accounted for the effects of risk factors that a) showed sex differences; b) were linked to shift work; and c) could  
73 have a causal role in asthma. Finally, we explored potential mechanisms explaining how our results linked to  
74 differing chronotypes and sex hormone levels.

75 Our study has some limitations. First, residual confounding could affect our results. For example, undefined  
76 occupational exposures could have effects on prevalent asthma especially when considering the different types of  
77 work undertaken by males and females (**Supplementary table 20**). However, we took steps to mitigate for this effect  
78 by including covariates that indicated jobs with high asthma risk or where a medical assessment for asthma was  
79 undertaken prior to employment. Second, in some subgroups of participants sample sizes were small resulting in  
30 limited power. Third, causal inference in a cross sectional study is not possible. Fourth, we potentially underestimate  
31 the detrimental effects of shift work on asthma caused by people becoming unwell as a result of their shift work and  
32 leaving employment. Lastly, the generalizability of our results may be limited as UK Biobank participants are  
33 generally healthier than the background population and have limited age, ethnic and social diversity (15).

34 Despite these limitations, our findings could have significant public health and clinical implications. The ability to  
35 reduce the risk of females developing asthma through modification of work schedules or through the introduction of  
36 HRT at menopause could have significant health-economic benefits.

### 37 **Interpretation**

38 Our study shows that the higher likelihood of moderate-severe asthma in shift workers compared to day workers is  
39 present in females but not in males. The mechanisms are unclear, but HRT may have a protective role in  
30 postmenopausal female shift workers. Future large RCTs are needed to test this hypothesis and provide clarity to an  
31 increasingly large proportion of our workforce.

32

33

34

## 35 References

- 36 1. Ricciardolo FLM, Levra S, Sprio AE, Bertolini F, Carriero V, Gallo F, Ciprandi G. Asthma in the Real-World: The  
37 Relevance of Gender. *Int Arch Allergy Immunol*. 2020;181(6):462-466. doi: 10.1159/000506808. Epub 2020 Mar  
38 23. PMID: 32203959.
- 39 2. Chowdhury NU, Guntur VP, Newcomb DC, Wechsler ME. Sex and gender in asthma. *European Respiratory*  
40 *Review* 2021 30: 210067; DOI: 10.1183/16000617.0067-2021Chowdhury NU.
- 41 3. Vetter C, Dashti HS, Lane JM, Anderson SG, Schernhammer ES, Rutter MK, Saxena R, Scheer FAJL. Night Shift  
42 Work, Genetic Risk, and Type 2 Diabetes in the UK Biobank. *Diabetes Care*. 2018 Apr;41(4):762-769. doi:  
43 10.2337/dc17-1933. Epub 2018 Feb 12. PMID: 29440150; PMCID: PMC5860836.
- 44 4. Roved J, Westerdahl H, Hasselquist D. Sex differences in immune responses: Hormonal effects, antagonistic  
45 selection, and evolutionary consequences. *Horm Behav*. 2017 Feb;88:95-105. doi: 10.1016/j.yhbeh.2016.11.017.  
46 Epub 2016 Dec 9. PMID: 27956226.
- 47 5. Turner-Warwick, M. Epidemiology of nocturnal asthma. *The American Journal of Medicine*, Volume 85, Issue 1,  
48 Supplement 2,1988,Pages 6-8, ISSN 0002-9343.
- 49 6. Yamazaki, S., Numano, R., Abe, M., et al. (2000) Resetting Central and Peripheral Circadian Oscillators in  
50 Transgenic rats. *Science*, 288, 682-685. <https://doi.org/10.1126/science.288.5466.682>
- 51 7. Cai W, Rambaud J, Teboul M, Masse I, Benoit G, Gustafsson JA, Delaunay F, Laudet V, Pongratz I. Expression  
52 levels of estrogen receptor beta are modulated by components of the molecular clock. *Mol Cell Biol*. 2008  
53 Jan;28(2):784-93. doi: 10.1128/MCB.00233-07. Epub 2007 Nov 26. PMID: 18039858; PMCID: PMC2223432.
- 54 8. Palmer LJ. UK Biobank: bank on it. *Lancet (London, England)*. 2007 Jun;369(9578):1980-1982. DOI:  
55 10.1016/s0140-6736(07)60924-6. PMID: 17574079.
- 56 9. Duffy JF, Cain SW, Chang AM, Phillips AJ, Münch MY, Gronfier C, Wyatt JK, Dijk DJ, Wright KP Jr, Czeisler CA. Sex  
57 difference in the near-24-hour intrinsic period of the human circadian timing system. *Proc Natl Acad Sci U S A*.  
58 2011 Sep 13;108 Suppl 3(Suppl 3):15602-8. doi: 10.1073/pnas.1010666108. Epub 2011 May 2. PMID: 21536890;  
59 PMCID: PMC3176605.

- 20 10. Cain SW, Dennison CF, Zeitzer JM, Guzik AM, Khalsa SB, Santhi N, Schoen MW, Czeisler CA, Duffy JF. Sex  
21 differences in phase angle of entrainment and melatonin amplitude in humans. *J Biol Rhythms*. 2010  
22 Aug;25(4):288-96. doi: 10.1177/0748730410374943. PMID: 20679498; PMCID: PMC3792014.
- 23 11. Klein, S., Flanagan, K. Sex differences in immune responses. *Nat Rev Immunol* **16**, 626–638 (2016).  
24 <https://doi.org/10.1038/nri.2016.90>
- 25 12. <http://www.tuc.org.uk/>
- 26 13. Allen, N. E., Sudlow, C., Peakman, T., Collins, R., & UK Biobank. (2014) UK biobank data: come and get it. *Science*  
27 *Translational Medicine*, 6(224).
- 28 14. Blackadar CB. Historical review of the causes of cancer. *World J Clin Oncol*. 2016 Feb 10;7(1):54-86. doi:  
29 10.5306/wjco.v7.i1.54. PMID: 26862491; PMCID: PMC4734938.
- 30 15. Maidstone, R. J., Turner, J., Vetter, C., Dashti, H. S., Saxena, R., Scheer, F. A. J. L., Shea, S. A., Kyle, S. D., Lawlor, D.  
31 A., Loudon, A. S. I., Blaikley, J. F., Rutter, M. K., Ray, D. W., & Durrington, H. J. (2021) Night shift work is  
32 associated with an increased risk of asthma. *Thorax*, 76(1).
- 33 16. UK Biobank. Biomarker Assay Quality Procedures: Approaches Used to Minimise Systematic and Random Errors  
34 (and the Wider Epidemiological Implications). 2019.
- 35 17. Miethe, S., Karsonova, A., Karaulov, A., & Renz, H. (2020) Obesity and asthma. *Journal of Allergy and Clinical*  
36 *Immunology*, 146(4).
- 37 18. Polosa, R. & Thomson, N. C. (2013) Smoking and asthma: dangerous liaisons. *European Respiratory Journal*,  
38 41(3).
- 39 19. Hu Z, Song X, & Hu K. (2022) The Effect of Short Sleep Duration on the Development of Asthma. *International*  
40 *Journal of Clinical Practice*. doi:10.1155/2022/3378821
- 41 20. Korsiak, J., Tranmer, J., Day, A., & Aronson, K. J., (2018) Sleep duration as a mediator between an alternating day  
42 and night shift work schedule and metabolic syndrome among female hospital employees. *Occupational and*  
43 *Environmental Medicine*, 75.
- 44 21. Ho, F. K., Celis-Morales, C., Gray, S. R., Demou, E., Mackay, D., Welsh, P., Katikireddi, S. V., Sattar, N., & Pell, J. P.  
45 (2022) Association and pathways between shift work and cardiovascular disease: a prospective cohort study of  
46 238,661 participants from UK Biobank. *International Journal of Epidemiology*, 51(2).

- 17 22. Hulsegge, G., Proper, K. I., Loef, B., Paagman, H., Anema, J. R., & van Mechelen, W. (2021) The mediating role of  
18 lifestyle in the relationship between shift work, obesity and diabetes. *International Archives of Occupational and*  
19 *Environmental Health*, 94.
- 20 23. Arathimos R, Granell R, Haycock P, Richmond RC, Yarmolinsky J, Relton CL, Tilling K. Genetic and observational  
21 evidence supports a causal role of sex hormones on the development of asthma. *Thorax*. 2019 Jul;74(7):633-642.  
22 doi: 10.1136/thoraxjnl-2018-212207. Epub 2019 Apr 1. PMID: 30936389; PMCID: PMC6585308. ).
- 23 24. Liang H, Li D, Zhu Y, Zhou X, Lin F, Jing D, Su X, Pan P, Zhang Y. Associations Between Reproductive Factors and  
24 the Risk of Adult-Onset Asthma: A Prospective Cohort Study of European Ancestry. *J Gen Intern Med*. 2023  
25 Aug;38(10):2354-2363. doi: 10.1007/s11606-023-08173-9. Epub 2023 Mar 29. PMID: 36988870; PMCID:  
26 PMC10407004.
- 27 25. Troisi RJ, et al. Menopause, postmenopausal estrogen preparations, and the risk of adult-onset asthma. A  
28 prospective cohort study. *Am J Respir Crit Care Med*. 1995;152(4 Pt 1):1183-8
- 29 26. Lange P, et al. Exogenous female sex steroid hormones and risk of asthma and asthma-like symptoms: a cross  
30 sectional study of the general population. *Thorax*. 2001;56(8):613-6
- 31 27. Triebner K., Johannessen A., Puggini L. et al. Menopause as a predictor of new-onset asthma: a longitudinal  
32 Northern European population study. *J Allergy Clin Immunol*. 2016; 137: 50-57).
- 33 28. Jarvis D, Leynaert B. The association of asthma, atopy and lung function with hormone replacement therapy and  
34 surgical cessation of menstruation in a population-based sample of English women. *Allergy*. 2008;63(1):95-102.
- 35 29. Shah SA, Tibble H, Pillinger R, McLean S, Ryan D, Critchley H, Price D, Hawrylowicz CM, Simpson CR, Soyiri IN,  
36 Appiagyei F, Sheikh A, Nwaru BI. Hormone replacement therapy and asthma onset in menopausal women:  
37 National cohort study. *J Allergy Clin Immunol*. 2021 May;147(5):1662-1670. doi: 10.1016/j.jaci.2020.11.024.  
38 Epub 2020 Dec 3. PMID: 33279576.
- 39 30. Hansen ESH, Aasbjerg K, Moeller AL, Meaidi A, Gade EJ, Torp-Pedersen C, Backer V. Inhaled anti-asthma  
40 therapies following hormone therapy in women: a nationwide cohort study. *ERJ Open Res*. 2022 Mar  
41 21;8(1):00611-2021. doi: 10.1183/23120541.00611-2021. PMID: 35350280; PMCID: PMC8943288.
- 42 31. Romieu I, et al. Postmenopausal hormone therapy and asthma onset in the E3N cohort. *Thorax*. 2010;65(4):292-



74 32. Gomez Real F, et al. Hormone replacement therapy, body mass index and asthma in perimenopausal women: a  
75 cross sectional survey. *Thorax*. 2006;61(1):34–40

76 33. Romieu I, et al. Postmenopausal hormone therapy and asthma onset in the E3N cohort. *Thorax*. 2010;65(4):292–  
77 7.).

## 78 **Take-Home Points**

79 **Study question:** Is increasing frequency of night shift work more strongly related to prevalent asthma in females  
30 than in males?

31 **Results:** Compared to female day workers, female permanent night shift workers had higher covariate-adjusted odds  
32 of moderate-severe asthma (OR: 1.50 (95% CI 1.18 – 1.91)) but there was no corresponding relationship in males (OR  
33 0.95 (95% CI 0.72 – 1.26); sex interaction p-value = 0.01).

34 **Interpretation:** Our finding that increasing night shift work frequency is more strongly related to asthma in females  
35 than in males could have Public Health implications.

36

37 **Table 1: Social-demographic characteristics by current shift work exposure (n=274,541)**

|                                     | Sex | Current work schedule |                                              |                                       |                            |
|-------------------------------------|-----|-----------------------|----------------------------------------------|---------------------------------------|----------------------------|
|                                     |     | Day workers           | Shift work, but never or rarely night shifts | Irregular shift work including nights | Permanent night shift work |
| N                                   | F   | 120,638               | 12,182                                       | 6,429                                 | 2,608                      |
|                                     | M   | 106,418               | 11,201                                       | 10,833                                | 4,232                      |
| Age (years)                         | F   | 52.92 (6.80)          | 52.79 (6.83)                                 | 51.43 (6.56)                          | 52.38 (6.80)               |
|                                     | M   | 53.98 (7.37)          | 53.23 (7.26)                                 | 51.80 (6.98)                          | 51.79 (6.90)               |
| <b>Smoker (%)</b>                   |     |                       |                                              |                                       |                            |
| Never                               | F   | 61.12                 | 56.63                                        | 57.54                                 | 56.33                      |
|                                     | M   | 54.73                 | 50.25                                        | 49.89                                 | 49.03                      |
| Previous                            | F   | 30.04                 | 30.21                                        | 27.16                                 | 25.88                      |
|                                     | M   | 34.01                 | 34.37                                        | 32.54                                 | 32.94                      |
| Current                             | F   | 8.60                  | 12.81                                        | 14.95                                 | 17.56                      |
|                                     | M   | 11.04                 | 15.04                                        | 17.07                                 | 17.70                      |
| Smoking pack-years                  | F   | 5.10 (10.75)          | 6.99 (12.92)                                 | 6.99 (12.98)                          | 8.52 (14.60)               |
|                                     | M   | 7.83 (15.03)          | 10.25 (17.58)                                | 10.80 (17.70)                         | 11.63 (18.63)              |
| Drink alcohol daily (%)             | F   | 16.13                 | 13.11                                        | 12.02                                 | 7.17                       |
|                                     | M   | 25.2                  | 20.78                                        | 18.30                                 | 12.17                      |
| Monthly units of alcohol consumed * | F   | 35.80 (45.45)         | 31.15 (46.12)                                | 30.77 (47.73)                         | 23.61 (41.07)              |
|                                     | M   | 82.06 (89.02)         | 78.93 (101.45)                               | 82.81 (100.99)                        | 71.70 (87.70)              |
| Sleep Duration (h)                  | F   | 7.10 (1.07)           | 7.01 (1.26)                                  | 6.93 (1.31)                           | 6.75 (1.62)                |
|                                     | M   | 6.99 (0.96)           | 6.89 (1.15)                                  | 6.81 (1.21)                           | 6.64 (1.38)                |
| <b>Chronotype (%)</b>               |     |                       |                                              |                                       |                            |
| Morning                             | F   | 24.00                 | 25.78                                        | 24.04                                 | 21.78                      |
|                                     | M   | 22.63                 | 25.63                                        | 22.26                                 | 17.83                      |
| Intermediate                        | F   | 60.02                 | 57.97                                        | 56.39                                 | 51.53                      |
|                                     | M   | 57.16                 | 54.45                                        | 54.51                                 | 48.44                      |
| Evening                             | F   | 7.94                  | 7.94                                         | 10.85                                 | 16.95                      |
|                                     | M   | 8.06                  | 7.60                                         | 9.27                                  | 16.81                      |
| Do not know                         | F   | 7.93                  | 8.01                                         | 8.45                                  | 9.24                       |
|                                     | M   | 11.99                 | 12.01                                        | 13.67                                 | 16.31                      |
| <b>Ethnicity (%)</b>                |     |                       |                                              |                                       |                            |
| White British                       | F   | 88.29                 | 83.66                                        | 78.50                                 | 77.80                      |
|                                     | M   | 89.09                 | 83.46                                        | 81.29                                 | 83.48                      |
| White Other                         | F   | 6.71                  | 7.35                                         | 7.78                                  | 6.86                       |
|                                     | M   | 6.01                  | 6.62                                         | 6.52                                  | 5.46                       |
| Mixed                               | F   | 0.77                  | 0.95                                         | 1.35                                  | 1.07                       |
|                                     | M   | 0.50                  | 0.79                                         | 0.73                                  | 0.61                       |
| Asian                               | F   | 1.40                  | 2.72                                         | 2.47                                  | 2.68                       |
|                                     | M   | 2.01                  | 4.49                                         | 4.46                                  | 3.80                       |
| Black                               | F   | 1.54                  | 2.77                                         | 6.16                                  | 7.02                       |
|                                     | M   | 1.17                  | 2.48                                         | 4.00                                  | 4.30                       |
| Chinese                             | F   | 0.37                  | 0.56                                         | 0.68                                  | 1.04                       |
|                                     | M   | 0.28                  | 0.36                                         | 0.30                                  | 0.45                       |
| Other                               | F   | 6.71                  | 7.35                                         | 7.78                                  | 6.86                       |
|                                     | M   | 6.01                  | 6.62                                         | 6.52                                  | 5.46                       |
| Weekly work hours                   | F   | 30.84 (12.15)         | 31.40 (11.73)                                | 34.98 (12.57)                         | 34.73 (14.08)              |
|                                     | M   | 39.16 (11.59)         | 40.28 (11.34)                                | 43.55 (12.45)                         | 43.32 (11.49)              |
| Single Occupancy (%)                | F   | 16.94                 | 20.06                                        | 21.61                                 | 20.84                      |
|                                     | M   | 13.97                 | 17.24                                        | 16.75                                 | 16.71                      |
| Urban area (%)                      | F   | 86.23                 | 89.06                                        | 88.84                                 | 90.17                      |
|                                     | M   | 85.43                 | 89.94                                        | 89.47                                 | 91.35                      |
| Townsend Index                      | F   | -2.17 (-3.65 to 0.28) | -1.41 (-3.22 to 1.53)                        | -1.23 (-3.15 to 1.75)                 | -0.98 (-3.08 to 2.08)      |
|                                     | M   | -2.34 (-3.76 to 0.04) | -1.26 (-3.17 to 1.64)                        | -1.30 (-3.20 to 1.78)                 | -1.09 (-3.01 to 2.00)      |

38 Data are mean (SD) or percentages. \* indicates variable with >20% missing data from participants.

39 **Table 2: Health characteristics by current shift work exposure (n=274,541)**

|                                                           | Sex | Current work schedule |                                              |                                       |                            |
|-----------------------------------------------------------|-----|-----------------------|----------------------------------------------|---------------------------------------|----------------------------|
|                                                           |     | Day workers           | Shift work, but never or rarely night shifts | Irregular shift work including nights | Permanent night shift work |
| N                                                         | F   | 120,638               | 12,182                                       | 6,429                                 | 2,608                      |
|                                                           | M   | 106,418               | 11,201                                       | 10,833                                | 4,232                      |
| BMI (kg/m <sup>2</sup> )                                  | F   | 26.64 (5.05)          | 27.42 (5.40)                                 | 27.69 (5.59)                          | 28.47 (5.78)               |
|                                                           | M   | 27.61 (4.06)          | 28.20 (4.42)                                 | 28.51 (4.39)                          | 28.54 (4.20)               |
| Birth Weight (kg)                                         | F   | 3.25 (0.61)           | 3.23 (0.66)                                  | 3.24 (0.64)                           | 3.22 (0.69)                |
|                                                           | M   | 3.45 (0.65)           | 3.42 (0.69)                                  | 3.44 (0.69)                           | 3.38 (0.72)                |
| High Cholesterol (%)                                      | F   | 5.36                  | 6.23                                         | 6.18                                  | 7.67                       |
|                                                           | M   | 10.79                 | 11.05                                        | 10.00                                 | 10.56                      |
| Sleep Apnoea (%)                                          | F   | 0.11                  | 0.10                                         | 0.20                                  | 0.04                       |
|                                                           | M   | 0.48                  | 0.55                                         | 0.54                                  | 0.40                       |
| Chronic Obstructive Airways Disease/COPD                  | F   | 0.15                  | 0.21                                         | 0.19                                  | 0.19                       |
|                                                           | M   | 0.12                  | 0.21                                         | 0.19                                  | 0.09                       |
| Emphysema/Chronic Bronchitis                              | F   | 0.64                  | 0.97                                         | 1.06                                  | 0.88                       |
|                                                           | M   | 0.76                  | 1.20                                         | 1.16                                  | 1.28                       |
| Bronchiectasis (%)                                        | F   | 0.15                  | 0.16                                         | 0.06                                  | 0.15                       |
|                                                           | M   | 0.12                  | 0.09                                         | 0.01                                  | 0.12                       |
| Interstitial Lung Disease (%)                             | F   | 0.01                  | 0.01                                         | 0.00                                  | 0.00                       |
|                                                           | M   | 0.03                  | 0.01                                         | 0.05                                  | 0.02                       |
| Other Respiratory Problems (%)                            | F   | 0.11                  | 0.13                                         | 0.14                                  | 0.12                       |
|                                                           | M   | 0.12                  | 0.21                                         | 0.16                                  | 0.05                       |
| Gastro-Oesophageal Reflux (%)                             | F   | 2.83                  | 3.44                                         | 3.42                                  | 4.26                       |
|                                                           | M   | 3.63                  | 3.96                                         | 4.17                                  | 4.23                       |
| Type 1 Diabetes (%)                                       | F   | 0.06                  | 0.07                                         | 0.03                                  | 0.08                       |
|                                                           | M   | 0.08                  | 0.05                                         | 0.05                                  | 0.05                       |
| Type 2 Diabetes (%)                                       | F   | 0.28                  | 0.42                                         | 0.39                                  | 0.42                       |
|                                                           | M   | 0.57                  | 0.77                                         | 0.71                                  | 0.66                       |
| Hypertension (%)                                          | F   | 17.21                 | 19.14                                        | 18.34                                 | 20.28                      |
|                                                           | M   | 23.80                 | 25.60                                        | 24.24                                 | 25.17                      |
| Cardiovascular Disease (%)                                | F   | 2.20                  | 2.94                                         | 2.80                                  | 2.91                       |
|                                                           | M   | 5.65                  | 5.93                                         | 5.21                                  | 4.87                       |
| Depression (%)                                            | F   | 5.97                  | 7.31                                         | 7.11                                  | 7.36                       |
|                                                           | M   | 3.13                  | 3.52                                         | 3.07                                  | 3.26                       |
| Anxiety/panic attacks (%)                                 | F   | 1.39                  | 1.53                                         | 1.28                                  | 1.30                       |
|                                                           | M   | 0.89                  | 0.95                                         | 0.66                                  | 0.76                       |
| Hayfever/Allergic Rhinitis/Allergy to house dust mite (%) | F   | 6.31                  | 5.82                                         | 5.62                                  | 5.21                       |
|                                                           | M   | 6.83                  | 5.76                                         | 5.86                                  | 4.96                       |
| Eczema/Dermatitis (%)                                     | F   | 2.75                  | 2.35                                         | 2.77                                  | 2.34                       |
|                                                           | M   | 2.69                  | 2.42                                         | 2.10                                  | 2.08                       |
| Allergy or Anaphylactic reaction to food/drug (%)         | F   | 1.57                  | 1.48                                         | 1.62                                  | 1.73                       |
|                                                           | M   | 0.88                  | 0.82                                         | 0.81                                  | 0.73                       |
| Testosterone (nmol/L)                                     | F   | 1.15 (0.68)           | 1.14 (0.68)                                  | 1.16 (0.67)                           | 1.19 (1.05)                |
|                                                           | M   | 12.06 (3.62)          | 12.11 (3.79)                                 | 12.10 (3.65)                          | 12.31 (3.82)               |
| Oestradiol (pmol/L)                                       | F   | 551.72 (487.86)       | 539.76 (425.59)                              | 541.74 (453.25)                       | 551.5 (448.08)             |
|                                                           | M   | 226.06 (88.75)        | 225.06 (70.61)                               | 223.48 (79.49)                        | 229.42 (77.60)             |
| SHBG (nmol/L)                                             | F   | 63.76 (31.78)         | 62.00 (32.50)                                | 61.61 (31.80)                         | 62.11 (32.24)              |
|                                                           | M   | 37.44 (15.59)         | 36.91 (16.11)                                | 35.99 (15.31)                         | 36.51 (15.83)              |
| Free Androgen Index                                       | F   | 2.34 (2.30)           | 2.43 (2.37)                                  | 2.48 (2.89)                           | 2.51 (2.93)                |
|                                                           | M   | 35.57 (14.24)         | 36.56 (19.71)                                | 37.40 (19.28)                         | 37.70 (17.35)              |
| Free Testosterone (nmol/L)                                | F   | 0.02 (0.01)           | 0.02 (0.01)                                  | 0.02 (0.01)                           | 0.02 (0.02)                |
|                                                           | M   | 0.23 (0.07)           | 0.23 (0.07)                                  | 0.23 (0.07)                           | 0.24 (0.07)                |

30 Data are mean (SD) or percentages.

31

A.

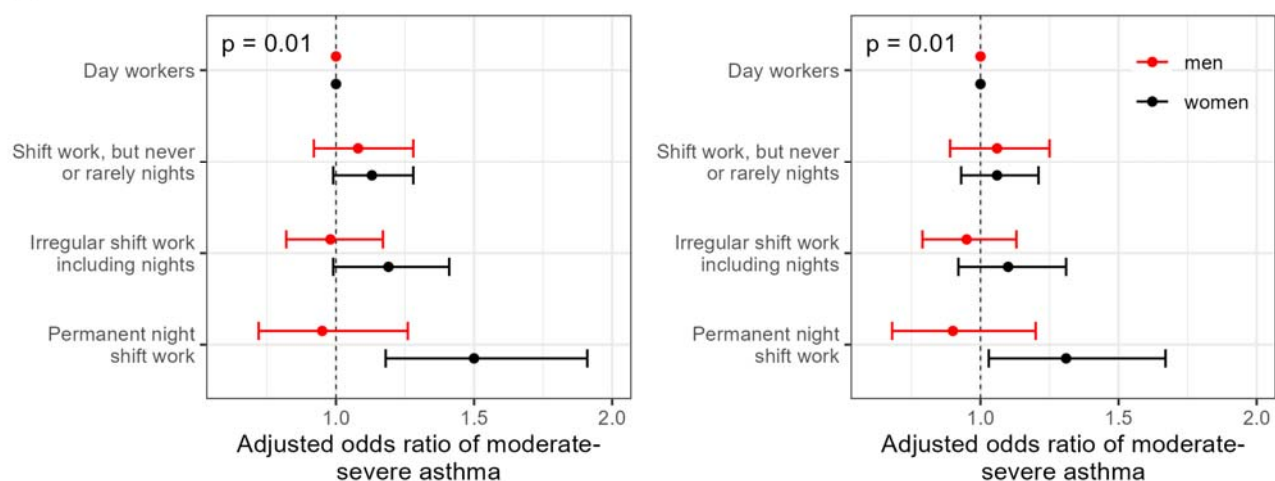

B.

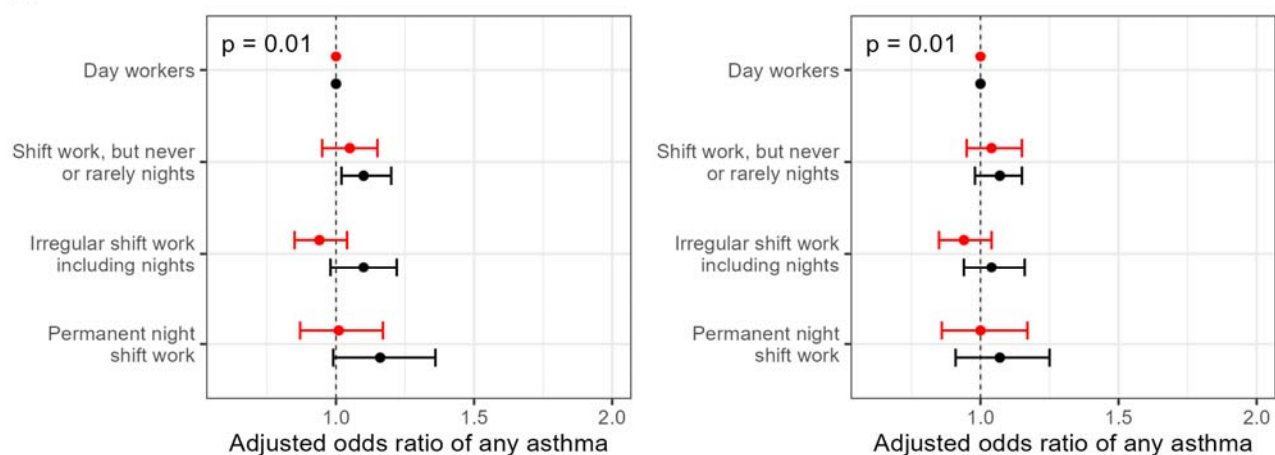

**Figure 1: Adjusted odds (95% CI) of asthma by current shift work exposure, stratified by sex. Odds ratios of moderate-severe asthma (A; n=245,356; 117,350 male and 128,006 female) and any asthma (B; n=254,396; 121,387 male and 133,009 female). (Left) Adjusted for covariates in Model 2: age, ethnicity, Townsend deprivation index, alcohol status, daily alcohol intake, days exercised (walked, moderate and vigorous), length of working week, job asthma risk, job medical required and chronotype. (Right) Adjusted for covariates in Model 3: Model 2 covariates plus sleep duration, smoking status, smoking pack years and BMI.**

A.

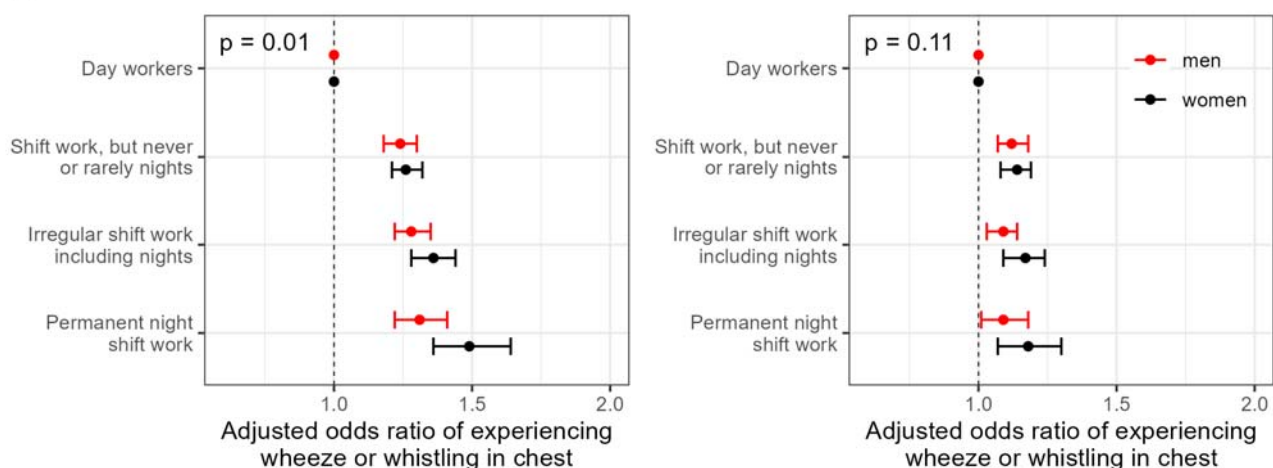

B.

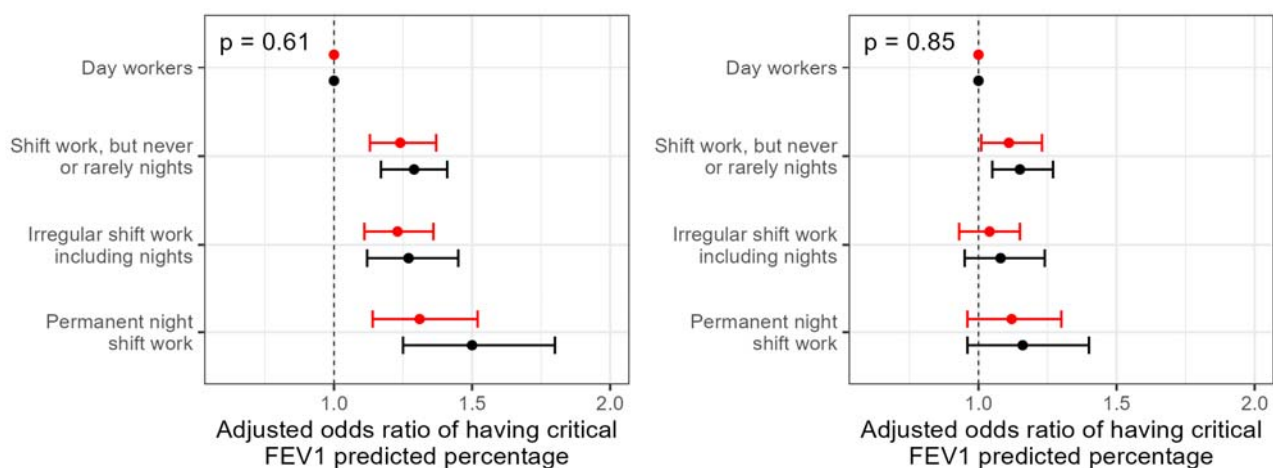

**Figure 2: Adjusted odds (95% CI) of asthma symptoms by current shift work exposure, stratified by sex. Odds ratios of experiencing wheeze or whistling in chest within the last year (A; n=268,255; 127,374 male and 140,881 female) and of having a critical (<80%) FEV1 predicted percentage (B; n=87,358; 39,061 male and 48,297 female). (Left) Adjusted for covariates in Model 2: age, ethnicity, Townsend deprivation index, alcohol status, daily alcohol intake, days exercised (walked, moderate and vigorous), length of working week, job asthma risk, job medical required and chronotype. (Right) Adjusted for covariates in Model 3: Model 2 covariates plus sleep duration, smoking status, smoking pack years and BMI.**

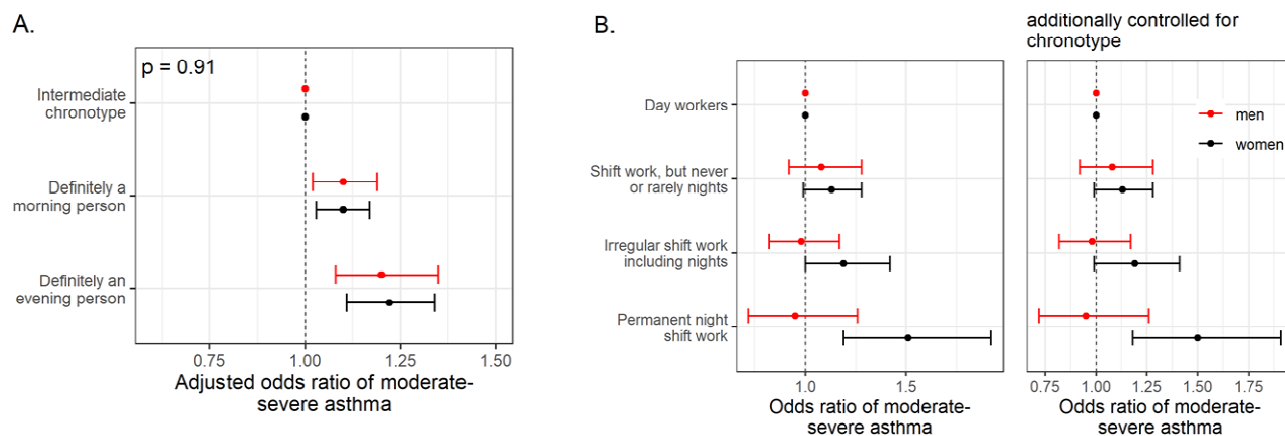

**Figure 3: A: Adjusted odds (95% CI) of moderate-severe asthma by chronotype, stratified by sex. (n=377,515; 165,629 male and 211,886 female, model 2). B: Adjusted odds (95% CI) of moderate-severe asthma by current shift work exposure stratified by sex. Odds ratios of moderate-severe asthma from model without chronotype (left) and model including chronotype (right) (n=245,356; 117,350 male and 128,006 female, model 2). Model 2 covariates: age, ethnicity, Townsend deprivation index, alcohol status, daily alcohol intake, days exercised (walked, moderate and vigorous), length of working week, job asthma risk, job medical required.**

**A. Self-reported or >50**

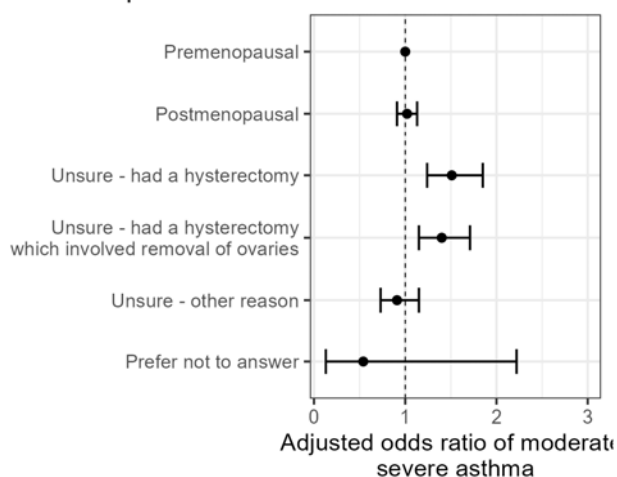

**B. A with no HRT or Current OCP**

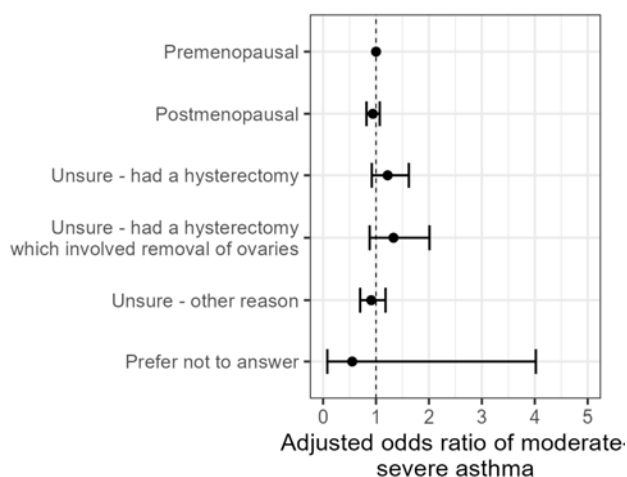

**Figure 4: Adjusted odds (95% CI) of moderate-severe asthma by menopause status. A: Odds ratios of moderate-severe asthma by self-reported menopause status (postmenopausal status additionally include females > 50) (n=221,331). B: Odds ratios of moderate-severe asthma after excluding females using exogenous sex hormones, such as oral contraceptive pill (OCP) or hormone replacement therapy (HRT) (n=139,822). Adjusted by Model 2 covariates: age, ethnicity, Townsend deprivation index, alcohol status, daily alcohol intake, days exercised (walked, moderate and vigorous), length of working week, job asthma risk, job medical required.**

**A. Self-reported or >50**

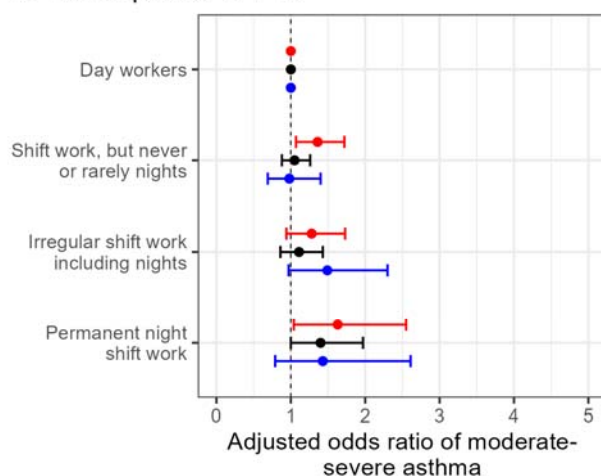

**B. A with no HRT or current OCP**

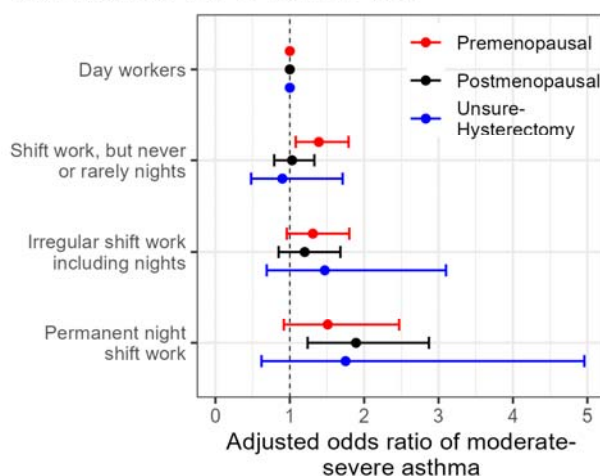

**Figure 5: Adjusted odds (95% CI) of moderate-severe asthma by current shift work exposure, stratified by menopause status. A: Odds ratios of moderate-severe asthma by self-reported menopause status (postmenopausal status additionally include females > 50) (n=124,374). B: Odds ratios of moderate-severe asthma after excluding females using exogenous sex hormones, such as oral contraceptive pill (OCP) or hormone replacement therapy (HRT) (n=86,485). Adjusted by Model 2 covariates: age, ethnicity, Townsend deprivation index, alcohol status, daily alcohol intake, days exercised (walked, moderate and vigorous), length of working week, job asthma risk, job medical required.**
